# Supplementary material for: Cambrian comb jellies from Utah illuminate the early evolution of nervous and sensory systems in ctenophores
Source: PubMed Central journal article supplement — iScience. 2021 Aug 4;24(9):102943. doi: 10.1016/j.isci.2021.102943 (PMC8426560; doi:10.1016/j.isci.2021.102943), 2021-08-04
Supplement: mmc1.pdf [file mmc1.pdf]

**iScience, Volume 24**

**Supplemental information**

**Cambrian comb jellies from Utah  
illuminate the early evolution of nervous  
and sensory systems in ctenophores**

**Luke A. Parry, Rudy Lerosey-Aubril, James C. Weaver, and Javier Ortega-Hernández**

## Supplementary Figures

Fig. S1

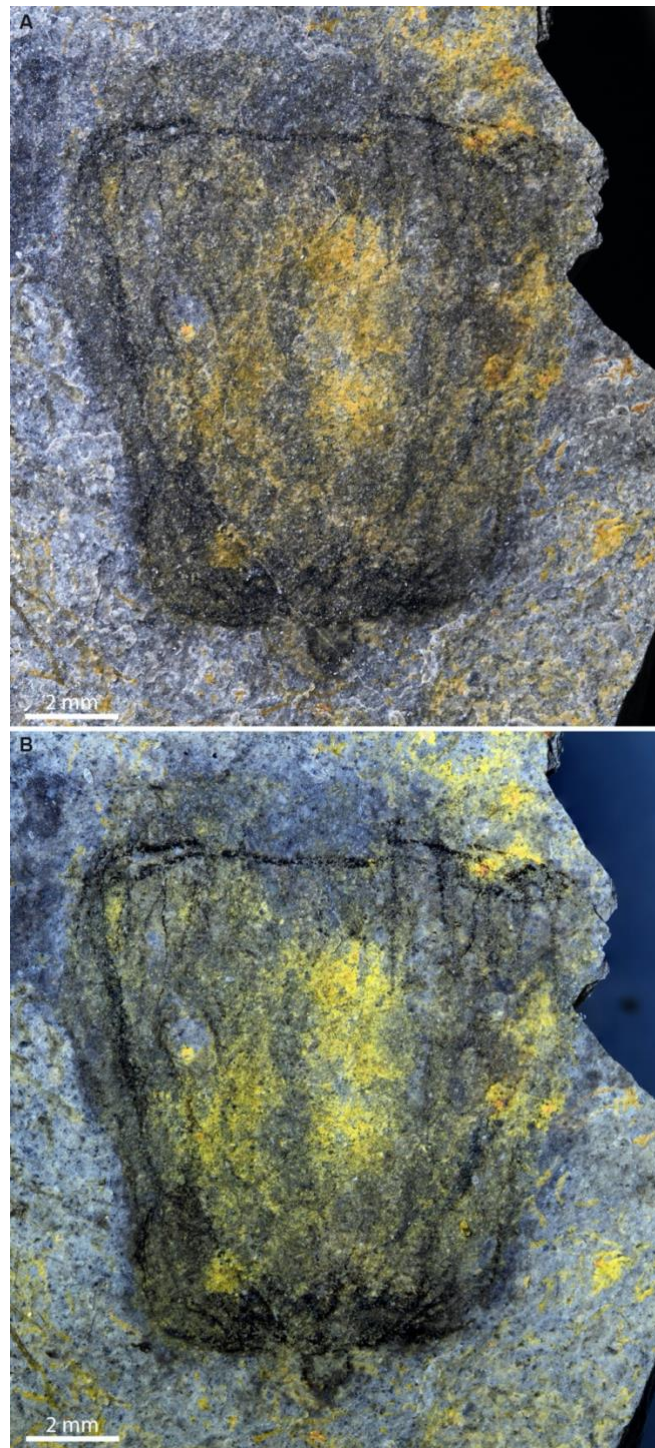

**Figure S1. Additional images of UMNH.IP.6125a, related to figure 2. A**, specimen dry, with high angle, cross polarised light. **B**, specimen wet with high angle, cross polarised light.

**Fig. S2**

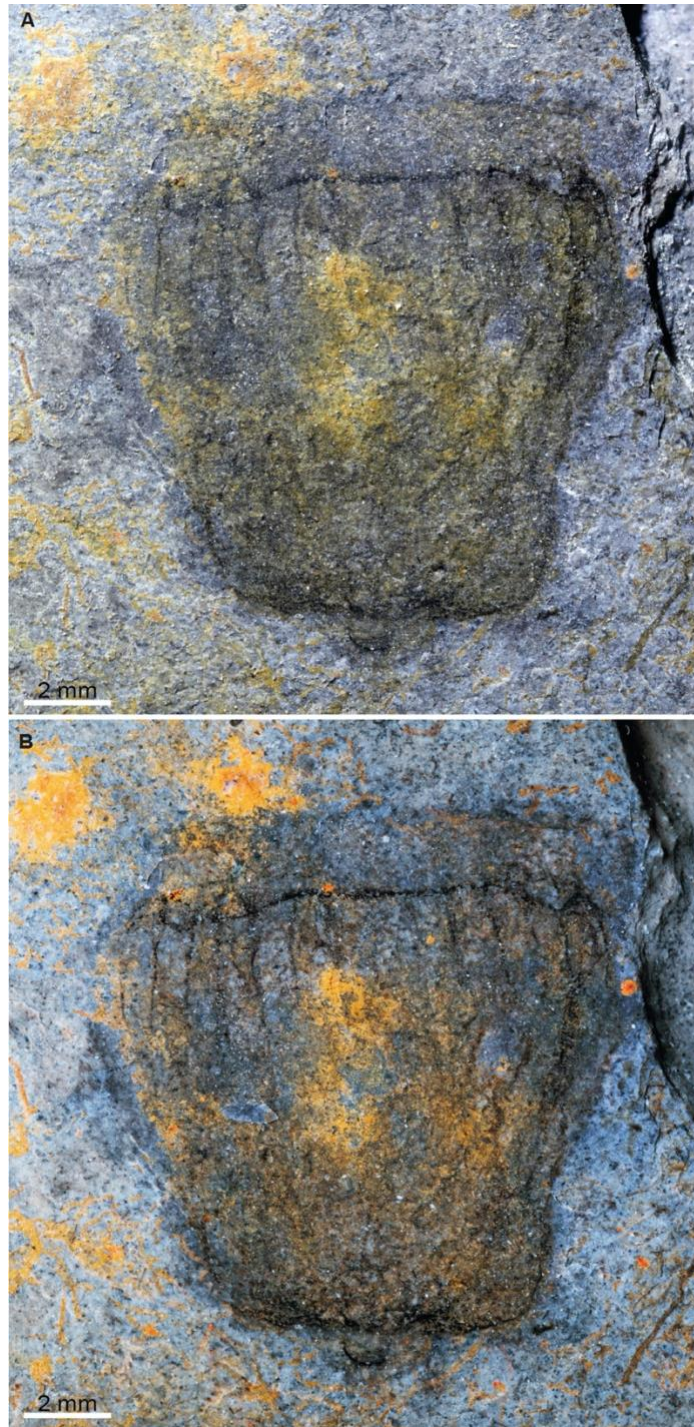

**Figure S2. Additional images of UMNH.IP.6125b, related to figure 2. A**, specimen dry, with high angle, cross polarised light. **B**, specimen wet with high angle, cross polarised light.

**Fig. S3**

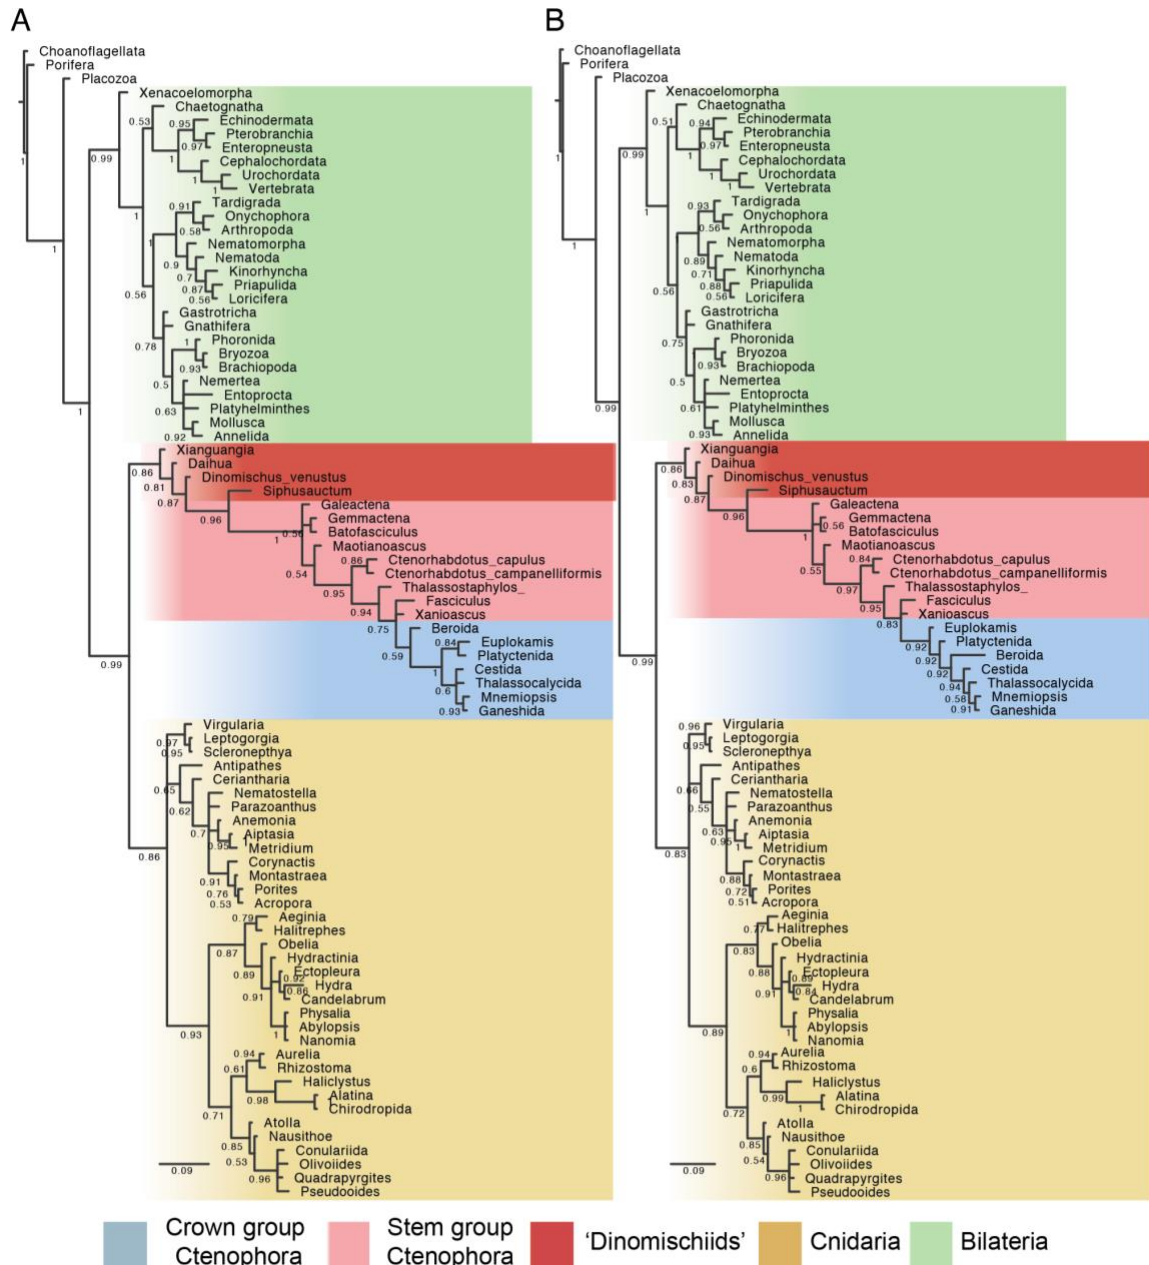

**Figure S3. Additional phylogenetic results, related to figure 5. A**, full results of the analysis with no topological constraints. **B**, full results of the analysis constraining relationships within the ctenophore crown group based on Whelan et al. [27]. Numbers at nodes are posterior probabilities and scale bars are in units of expected number of substitutions per site.

**Fig. S4**

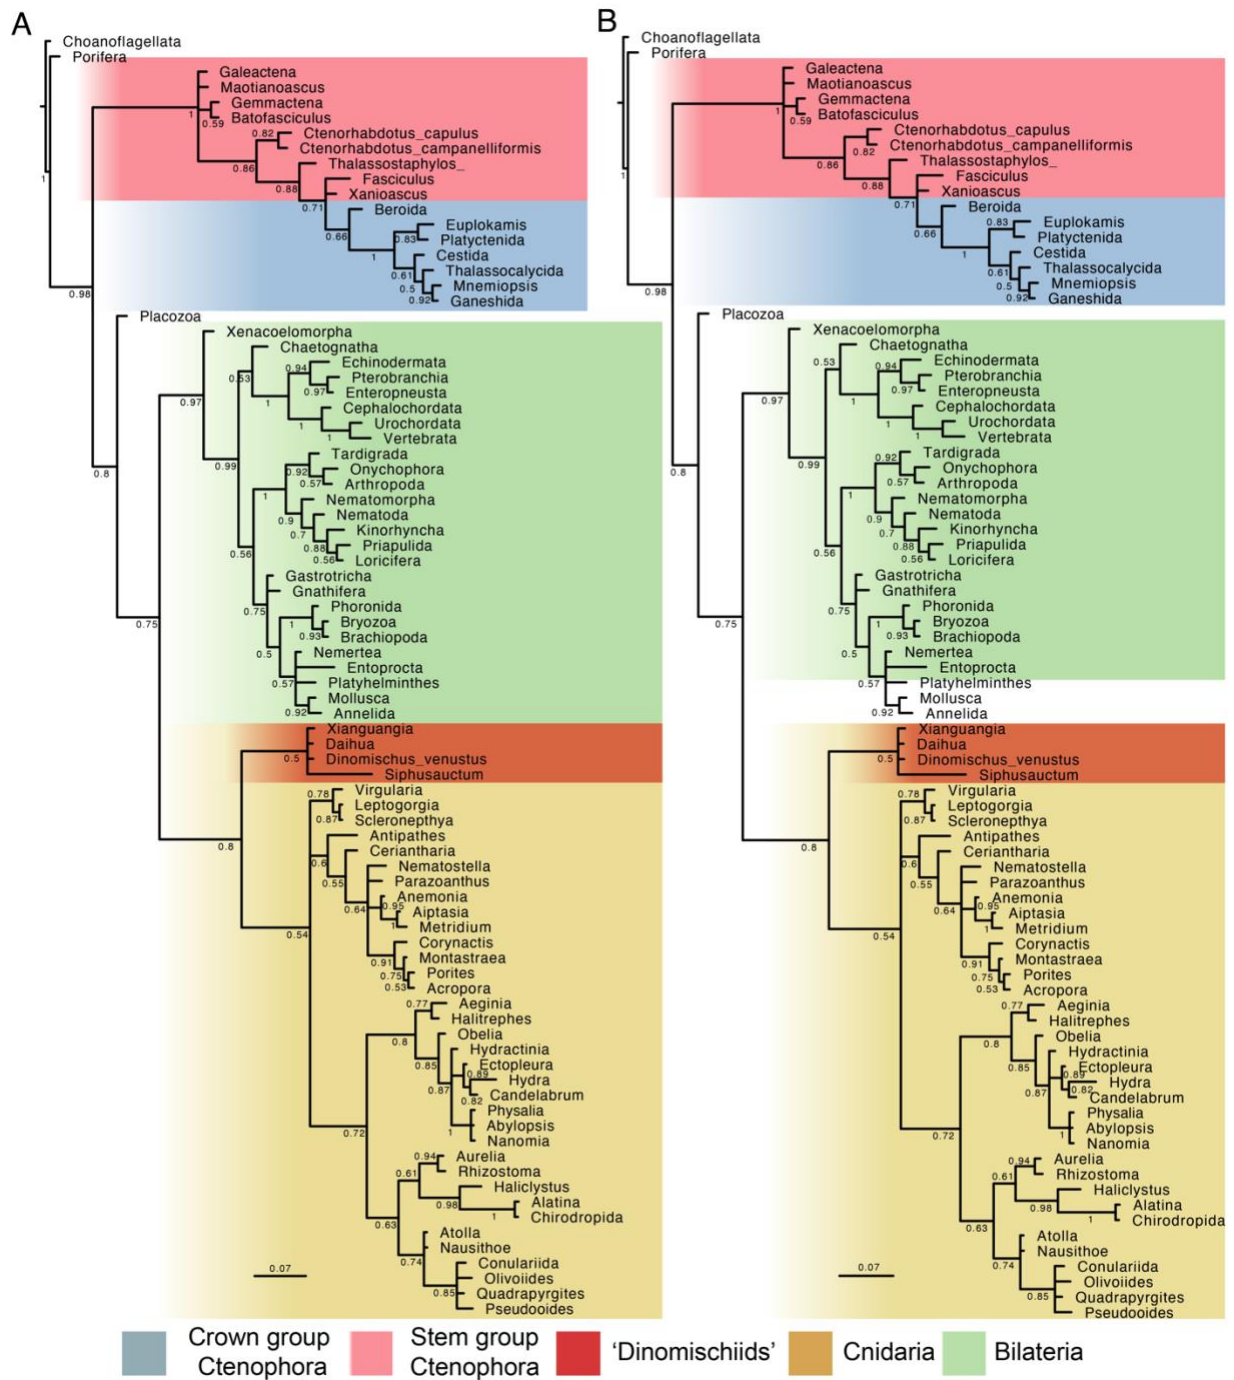

**Figure S4. Additional phylogenetic results, related to figure 5. A**, results of the analysis where the monophyly of Parahoxozoa/Planulozoa. **B**, results of the analysis where ctenophores are constrained as the sister group of all other animals. Numbers at nodes are posterior probabilities and scale bars are in units of expected number of substitutions per site.

**Table S1**

| SS run | Marg. Log Lik. H <sub>0</sub> = Coelenterata | Marg. Log Lik. H <sub>1</sub> = Coelenterata Whelan | Marg. Log Lik. H <sub>2</sub> = Parahoxozoa | Marg. Log Lik. H <sub>3</sub> = Ctenosister |
|--------|----------------------------------------------|-----------------------------------------------------|---------------------------------------------|---------------------------------------------|
| 1      | -2064.99                                     | -2063.16                                            | -2096.78                                    | -2101.75                                    |
| 2      | -2065.60                                     | -2063.91                                            | -2095.89                                    | -2102.24                                    |
| Mean   | -2065.25                                     | -2063.47                                            | -2096.24                                    | -2101.96                                    |

**Table S1. Marginal likelihoods of different models estimated using two independent runs of steppingstone sampling. Related to Figure 5.****Table S2**

|                                  | $2 \times \log_e B_{10}$ | Interpretation                                                                                           |
|----------------------------------|--------------------------|----------------------------------------------------------------------------------------------------------|
| H <sub>0</sub> vs H <sub>1</sub> | -1.78                    | Not worth more than a bare mention (i.e. some weak support for the Whelan <i>et al.</i> (2017) topology) |
| H <sub>0</sub> vs H <sub>2</sub> | 30.99                    | Coelenterata very strongly supported                                                                     |
| H <sub>0</sub> vs H <sub>3</sub> | 36.71                    | Coelenterata very strongly supported                                                                     |
| H <sub>2</sub> vs H <sub>3</sub> | 5.72                     | Parahoxozoa positively supported                                                                         |

**Table S2. Bayes factor comparison of the mean marginal likelihoods shown in Table S1, related to Figure 5.**
